# Supplementary material for: An Integrated Systems Biology Approach Identifies the Proteasome as A Critical Host Machinery for ZIKV and DENV Replication
Source: PubMed Central journal article supplement (PMC8498969; doi:10.1016/j.gpb.2020.06.016), 2021-02-19

NS-1 protein level in HEK293 cells

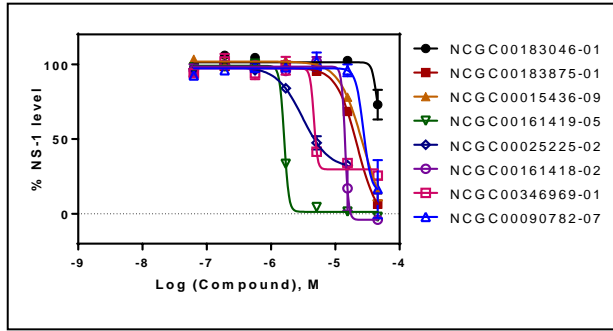

Compound cytotoxicity in HEK293 cells

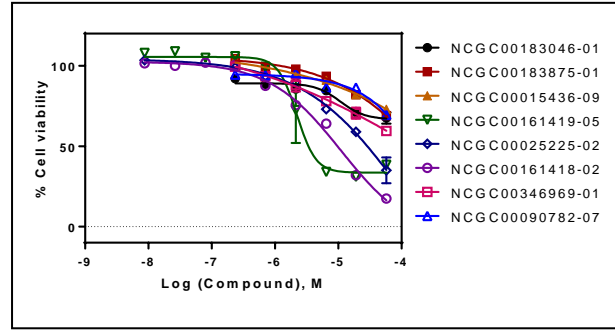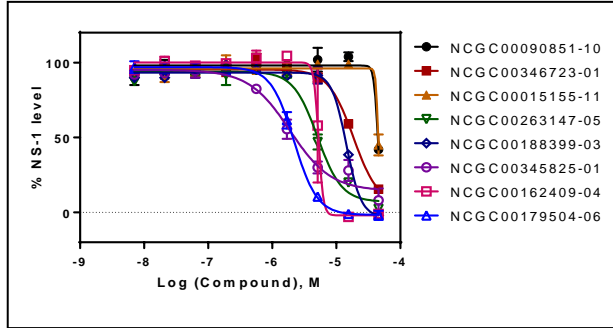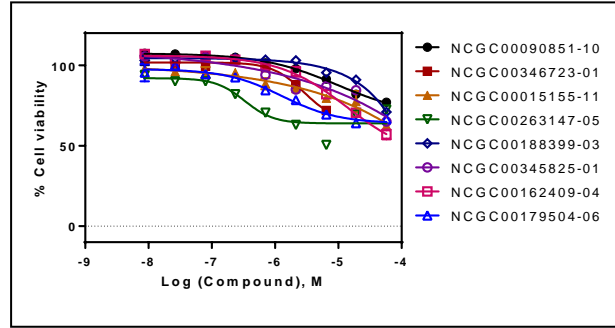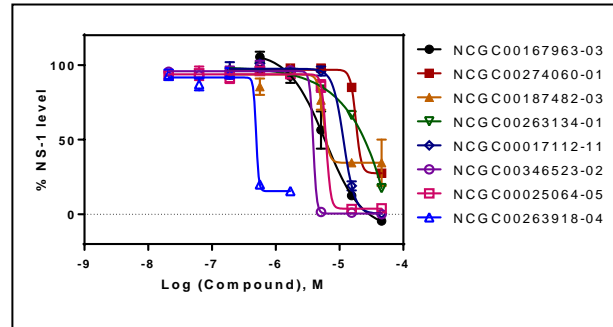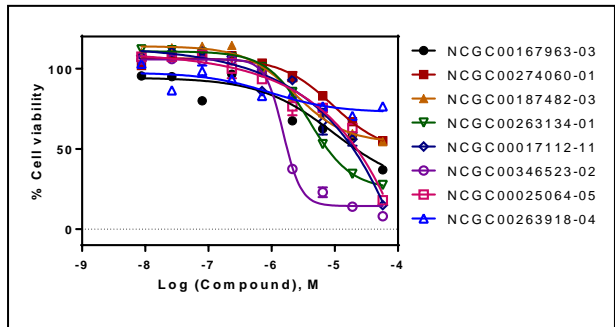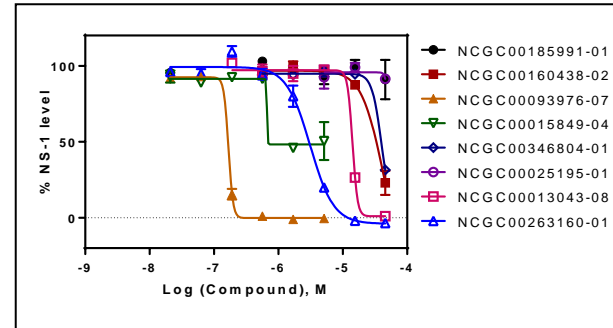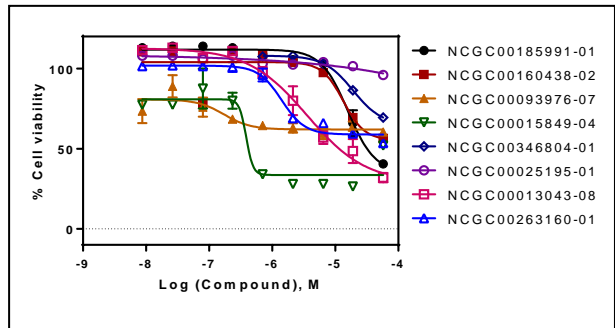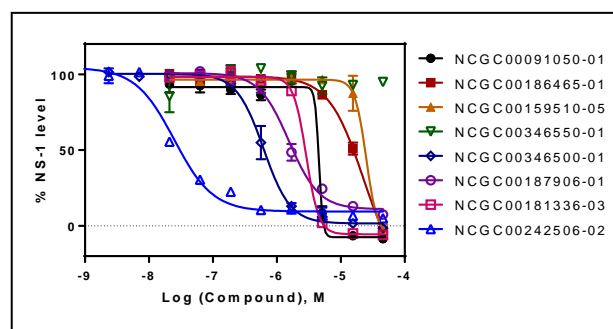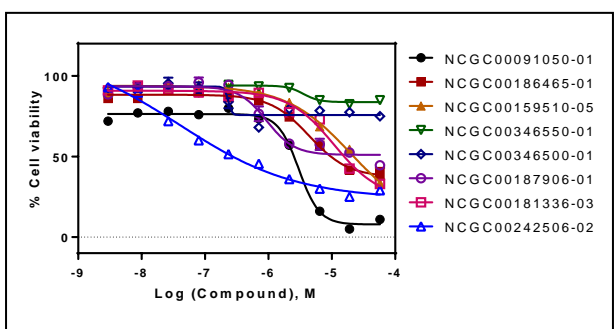

NS-1 protein level in HEK293 cells

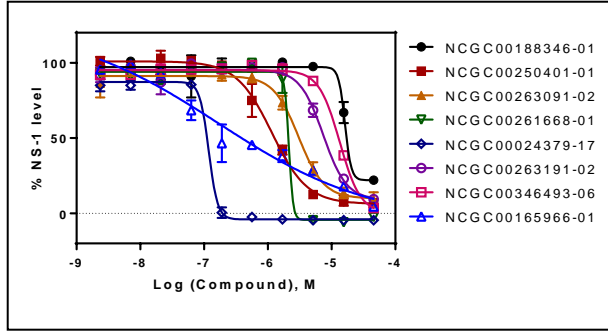

Compound cytotoxicity in HEK293 cells

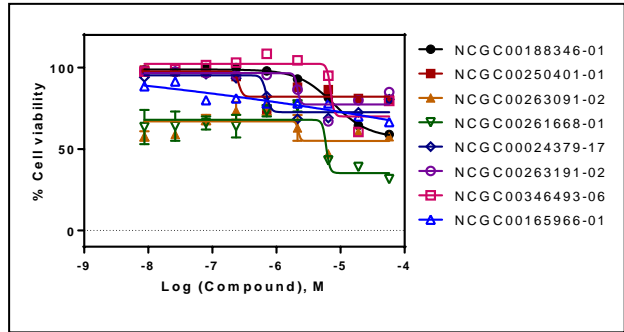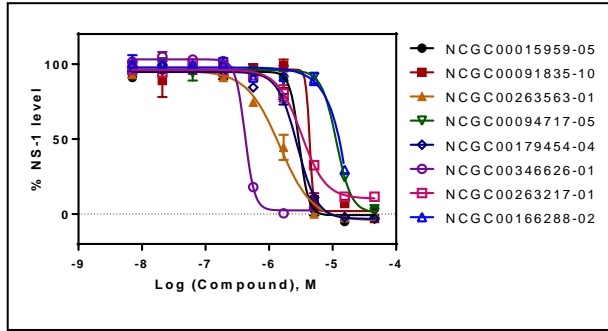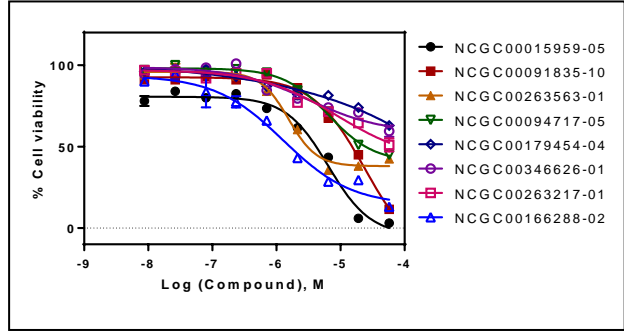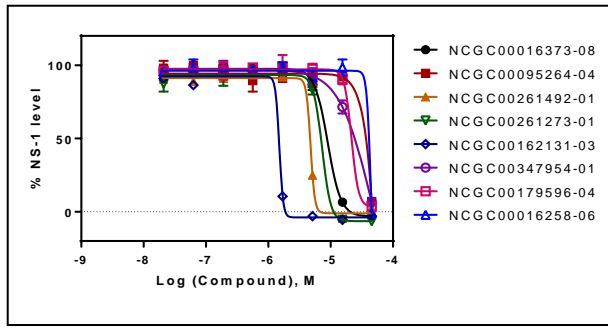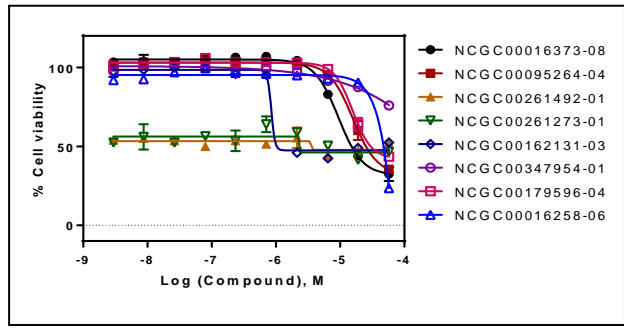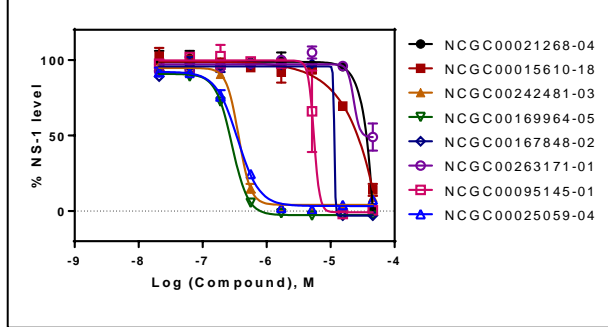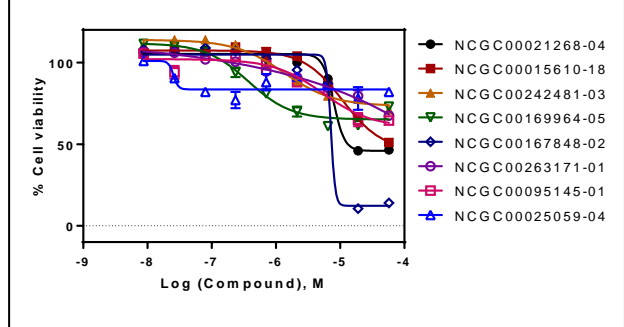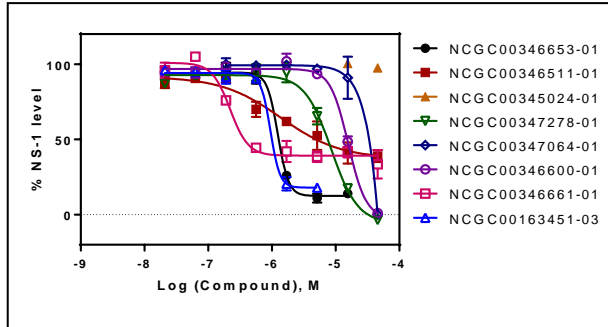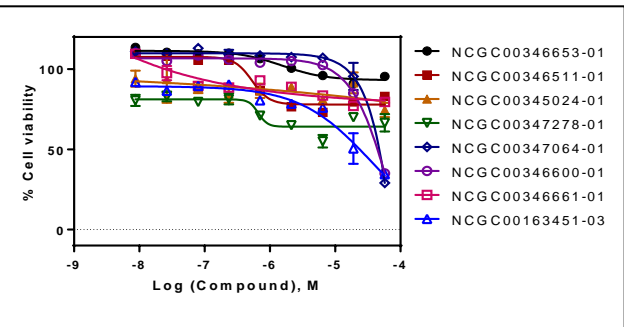

NS-1 protein level in HEK293 cells

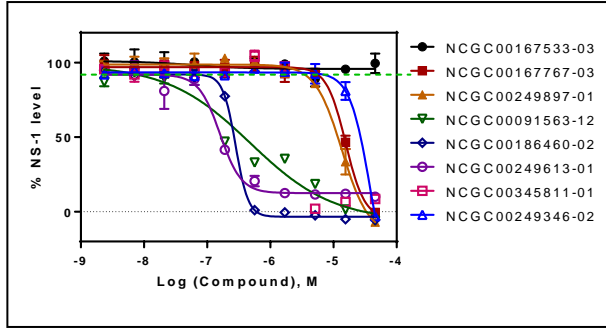

Compound cytotoxicity in HEK293 cells

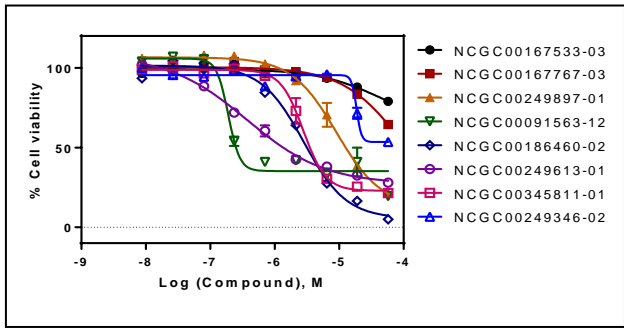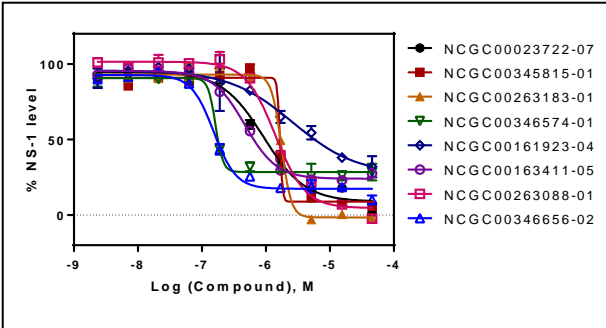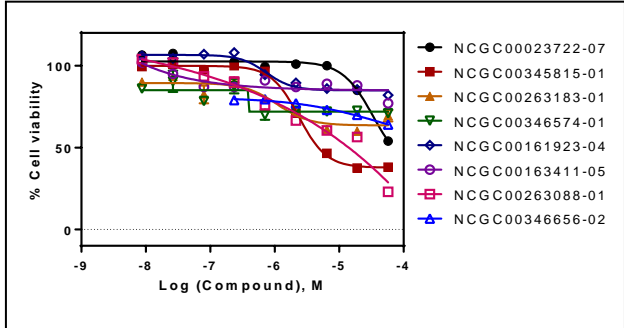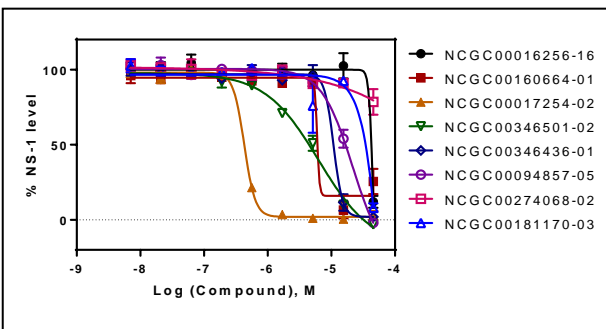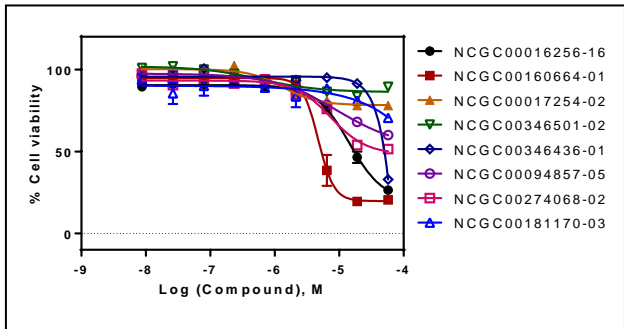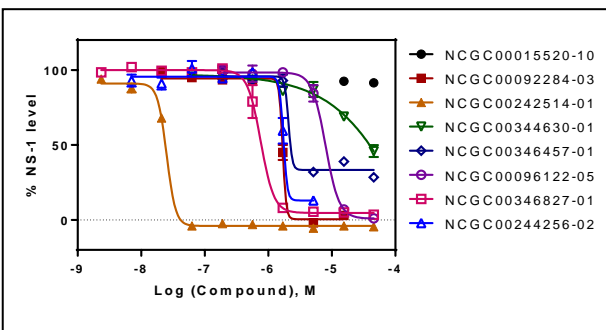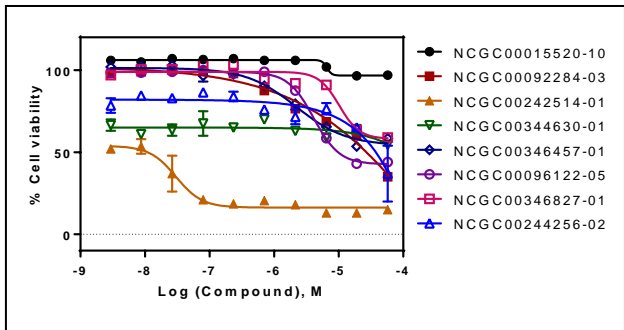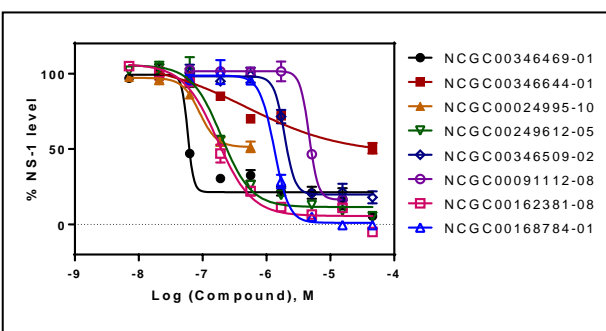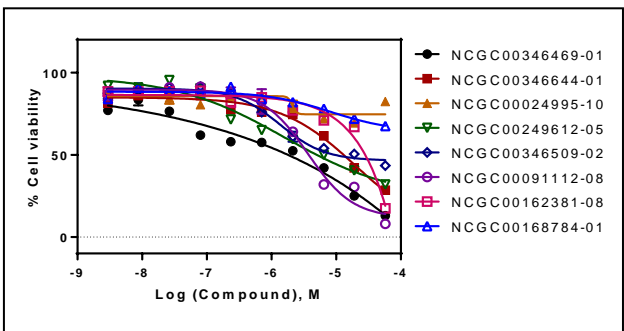

NS-1 protein level in HEK293 cells

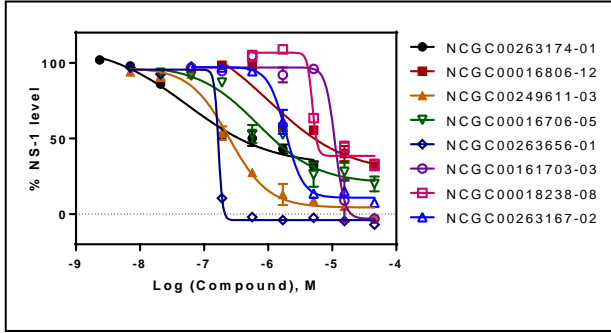

Compound cytotoxicity in HEK293 cells

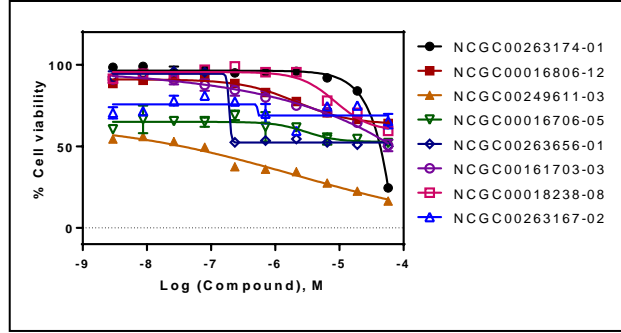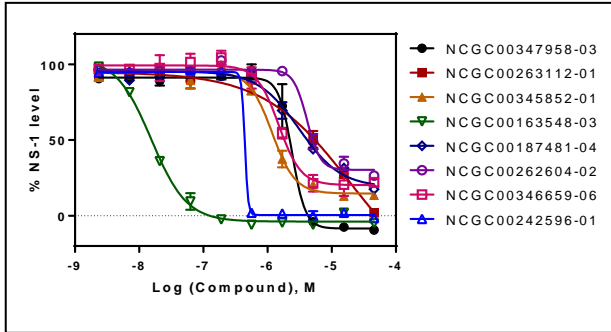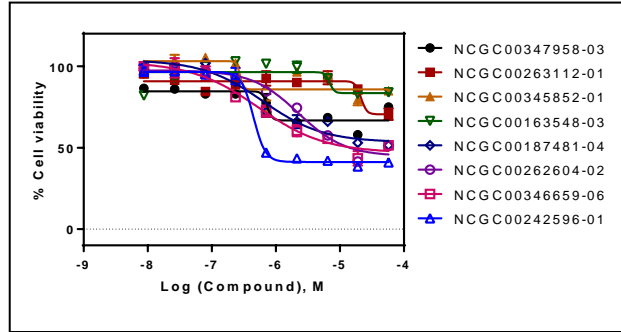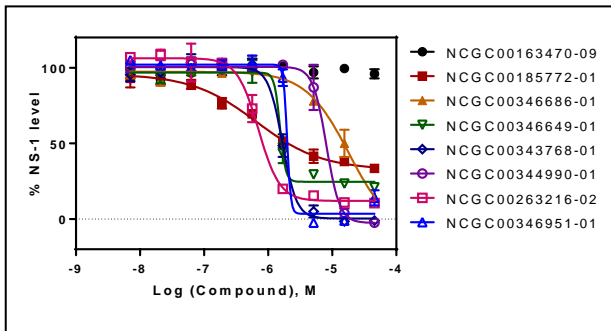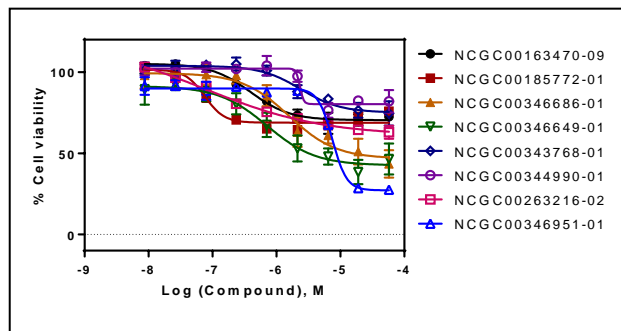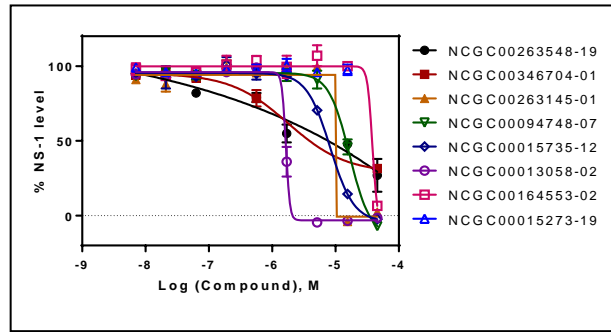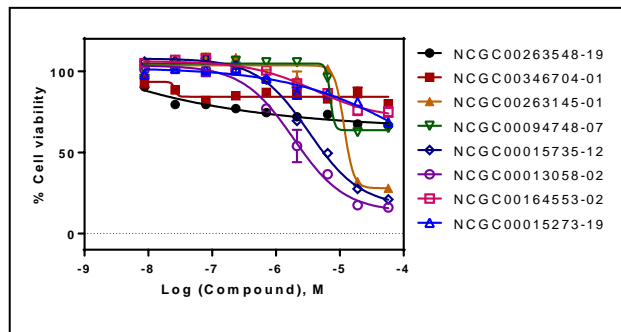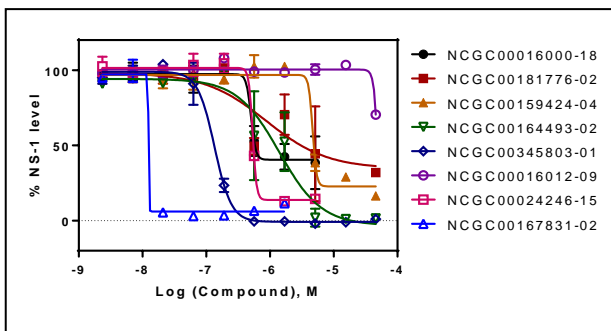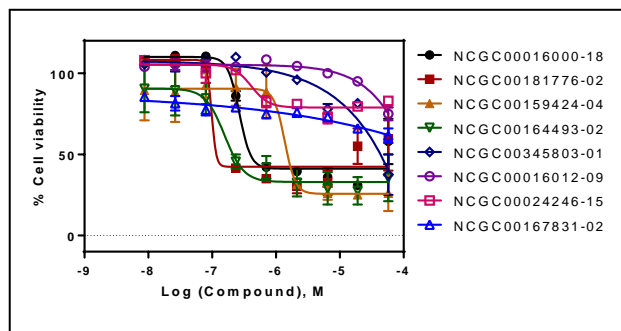

NS-1 protein level in HEK293 cells

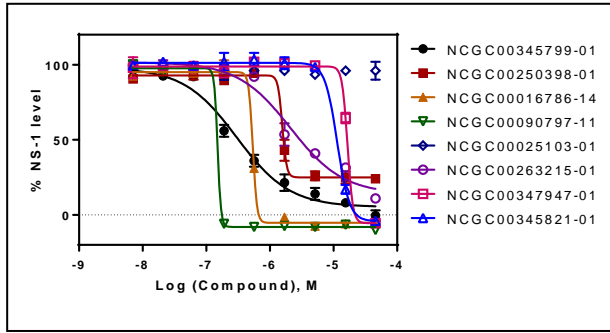

Compound cytotoxicity in HEK293 cells

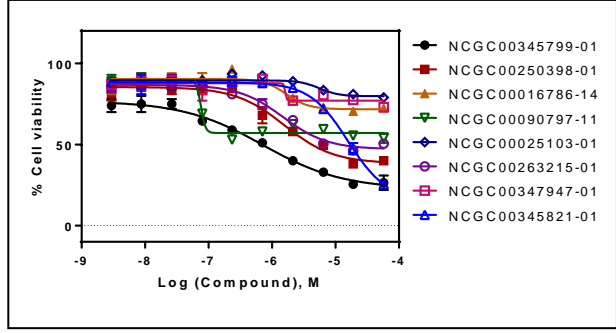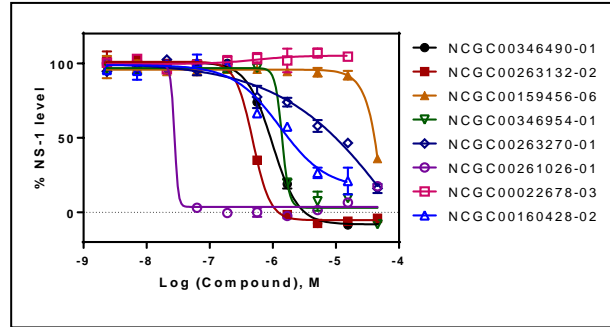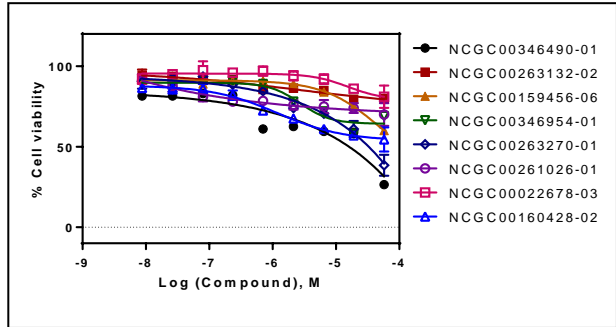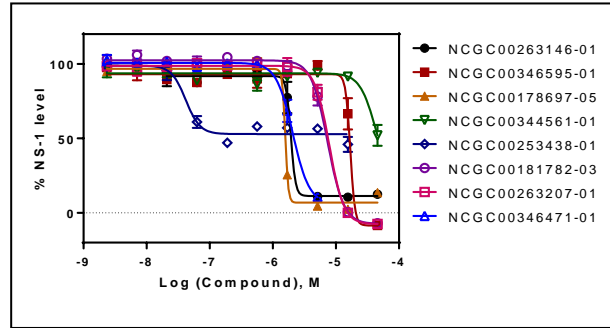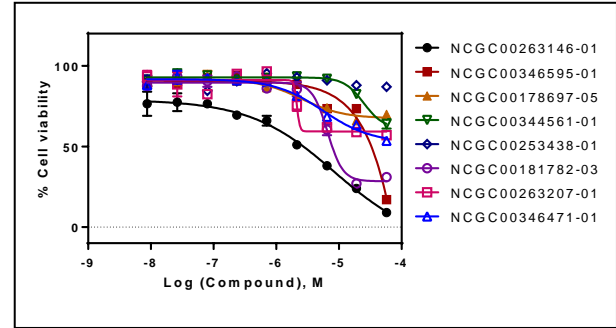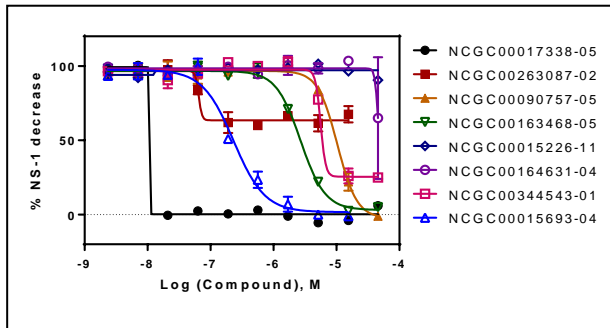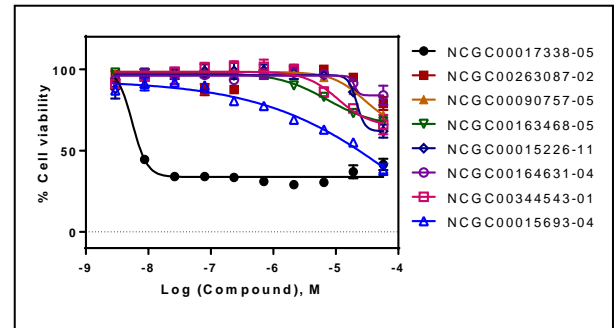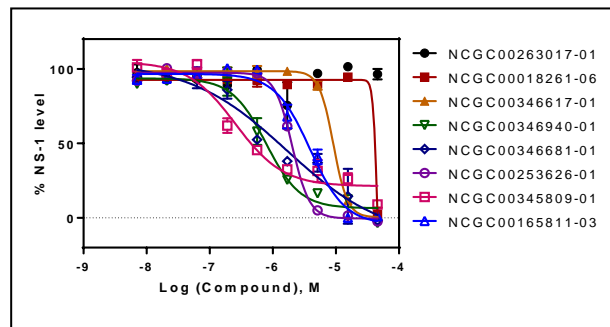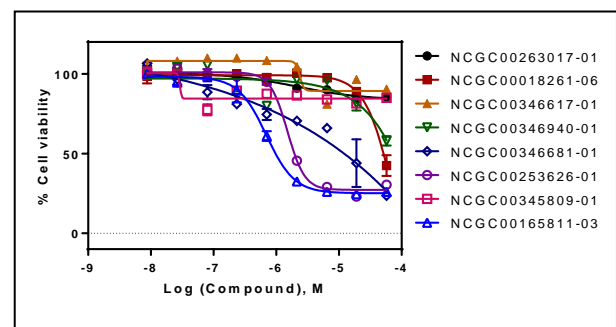

NS-1 protein level in HEK293 cells

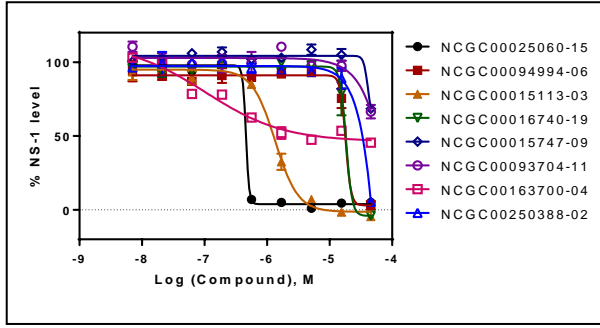

Compound cytotoxicity in HEK293 cells

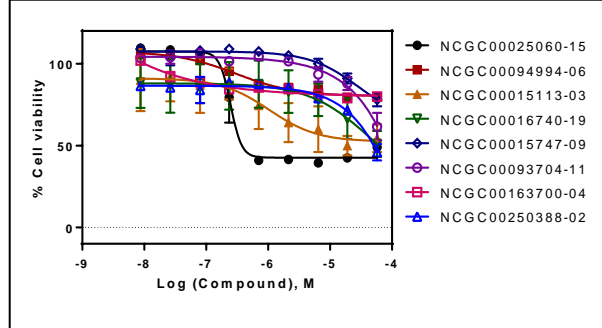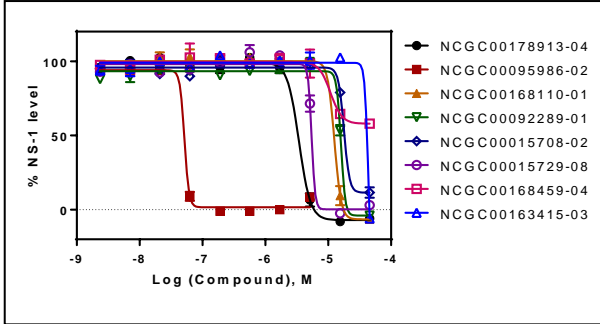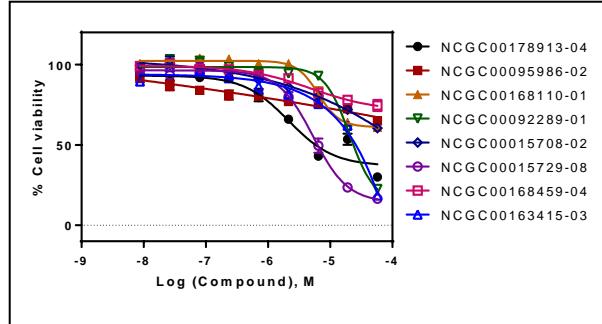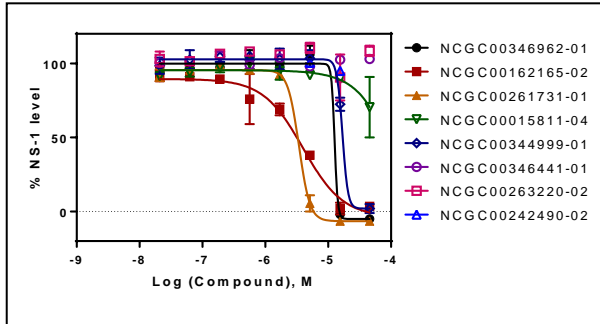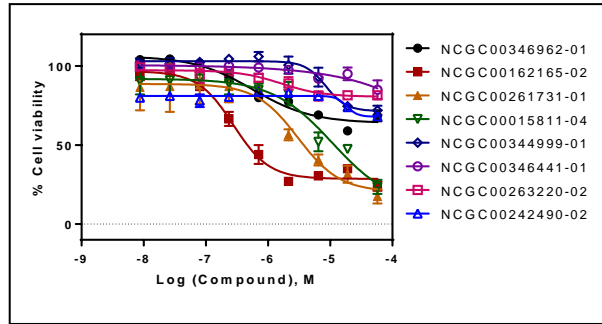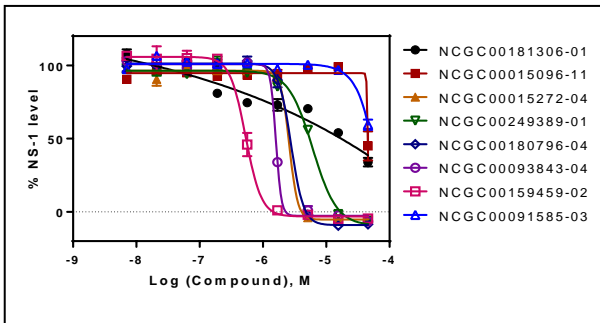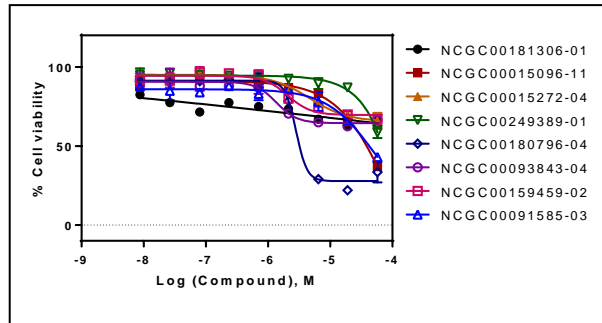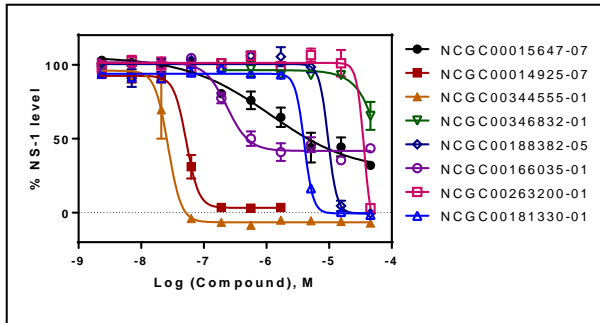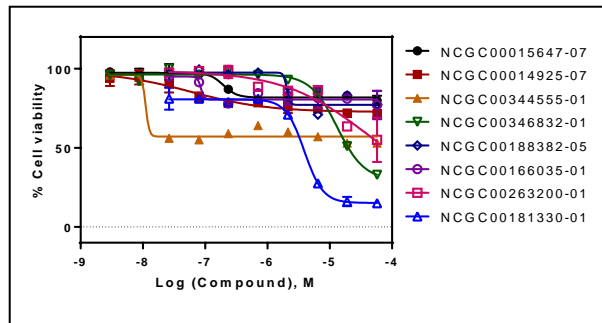

NS-1 protein level in HEK293 cells

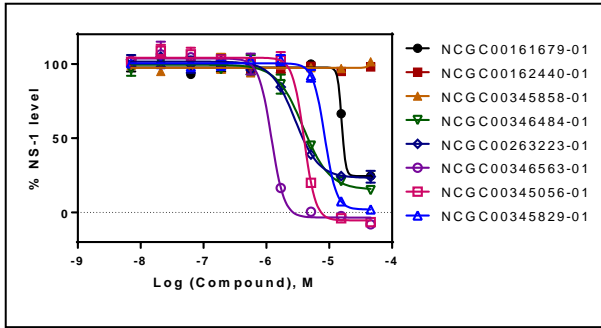

Compound cytotoxicity in HEK293 cells

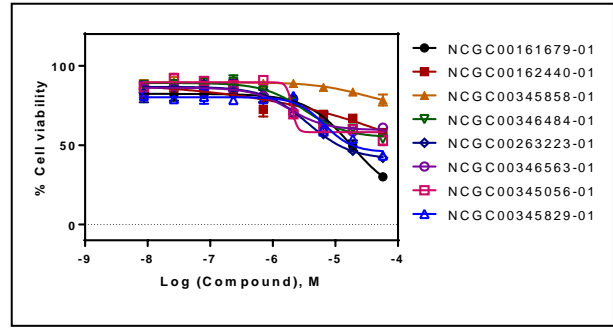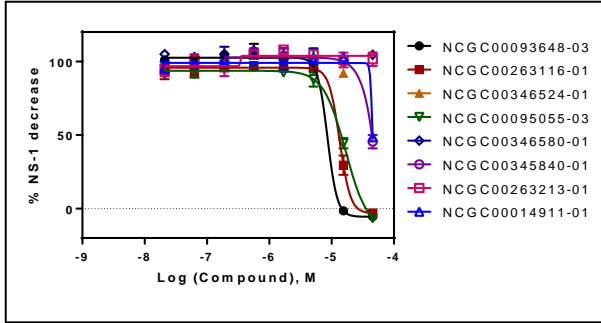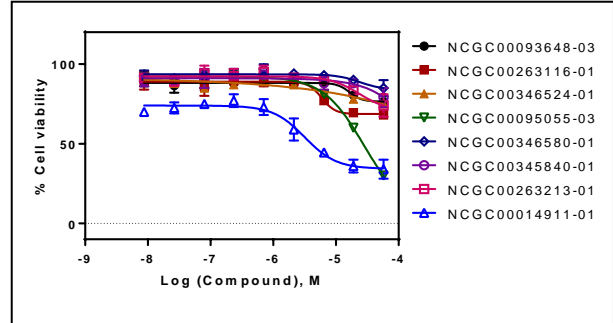

Supplement: mmc3.pdf [file mmc3.pdf]
