# Supplementary material for: An Integrated Systems Biology Approach Identifies the Proteasome as A Critical Host Machinery for ZIKV and DENV Replication
Source: PubMed Central journal article supplement (PMC8498969; doi:10.1016/j.gpb.2020.06.016), 2021-02-19
Supplement: mmc4.pdf [file mmc4.pdf]

**A**

+DENV-I

|             | Mock                                                                              | MLN-2238                                                                          | Carfilzomib                                                                       | Bortezomib                                                                         |
|-------------|-----------------------------------------------------------------------------------|-----------------------------------------------------------------------------------|-----------------------------------------------------------------------------------|------------------------------------------------------------------------------------|
| DAPI DENV-E | 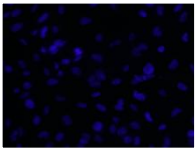 |  |  |  |
|             | DMSO                                                                              | Delanzomib                                                                        | Oprozomib                                                                         | MG-115                                                                             |
|             |  |  |  |  |

**B**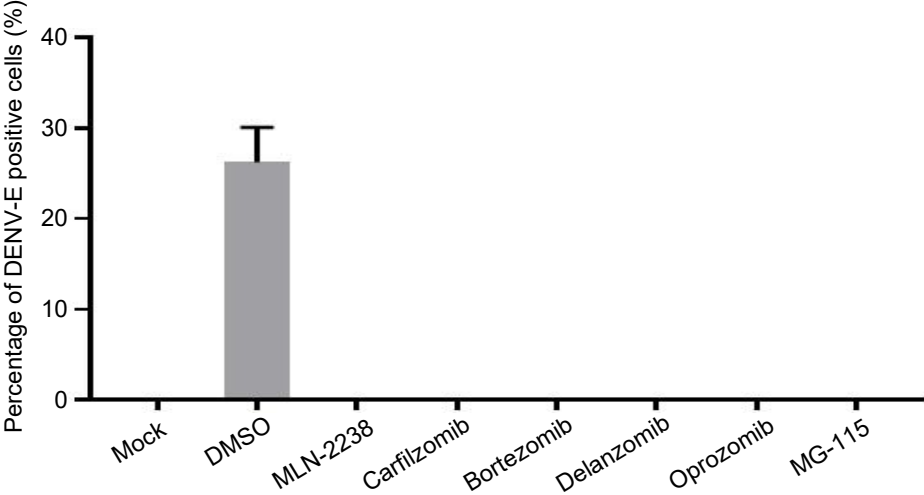

| Treatment   | Percentage of DENV-E positive cells (%) |
|-------------|-----------------------------------------|
| Mock        | 0                                       |
| DMSO        | ~26                                     |
| MLN-2238    | 0                                       |
| Carfilzomib | 0                                       |
| Bortezomib  | 0                                       |
| Delanzomib  | 0                                       |
| Oprozomib   | 0                                       |
| MG-115      | 0                                       |
